# Supplementary material for: Peeping into Mitochondrial Diversity of Andaman Goats: Unveils Possibility of Maritime Transport with Diversified Geographic Signaling
Source: MDPI journal article supplement (doi:10.3390/genes14040784), 2023-03-24
Supplement: s1 [file s1]

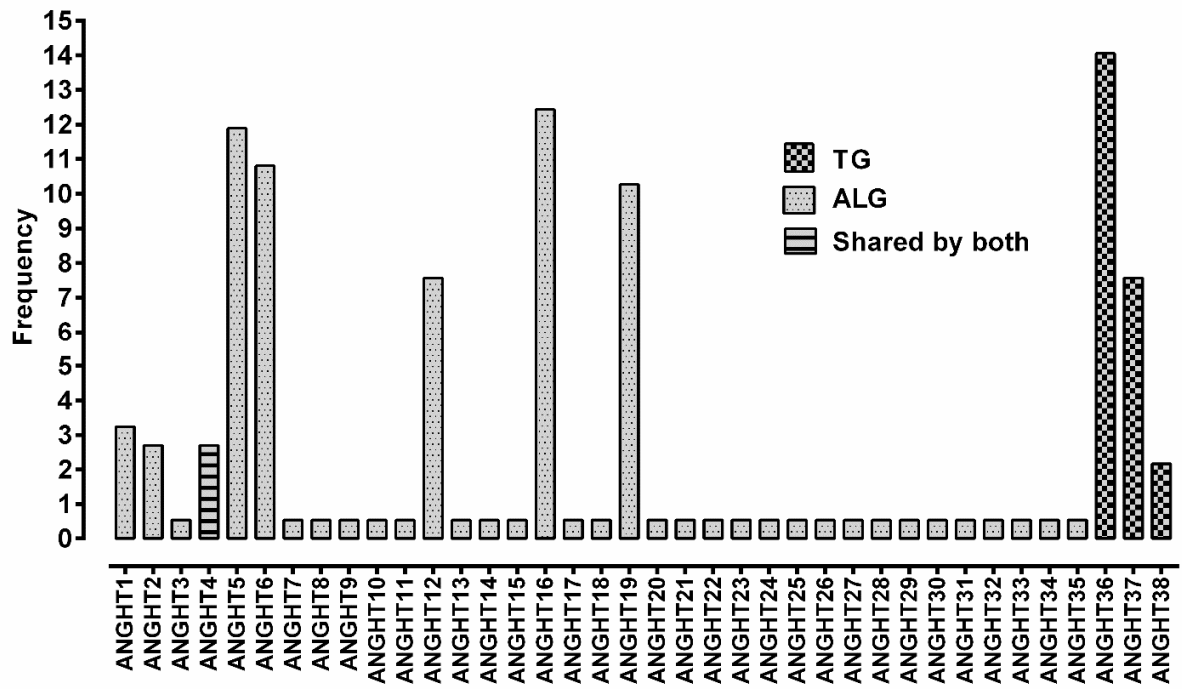

**Figure S1.** Frequency of the detected haplotypes of Andaman goats. ANG indicates Andaman goat, TG indicates Teresa goat and HT indicates haplotypes.

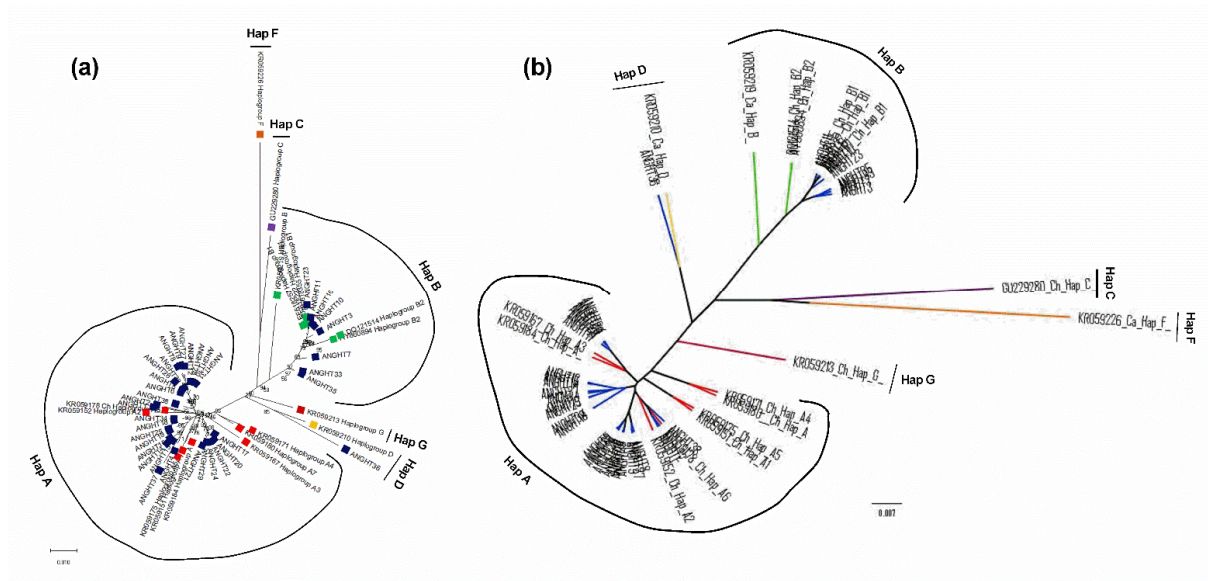

**Figure S2. Haplogroup assignment of different haplotypes of Andaman goat.** (a) Neighbor Joining (NJ) phylogenetic tree, (b) Bayesian phylogenetic tree. The GenBank accession numbers of the standard haplogroups used are as follows; A=KR059184, KR059151, KR059152, KR059167, KR059171, KR059175, KR059178, KR059180; B=KR059219, EF618257, EF618222, EF618355, DQ121514, AY860894; C=GU229280; D=KR059210; F=KR059226 and G=KR059213. NJ tree was drawn in MEGAX [27] and Bayesian phylogenetic tree was drawn in BEAST v1.10.4 [32]. The phylogenetic trees and network map were constructed based on 481 bp hypervariable region (HV1) of goat mitochondrial D-loop.

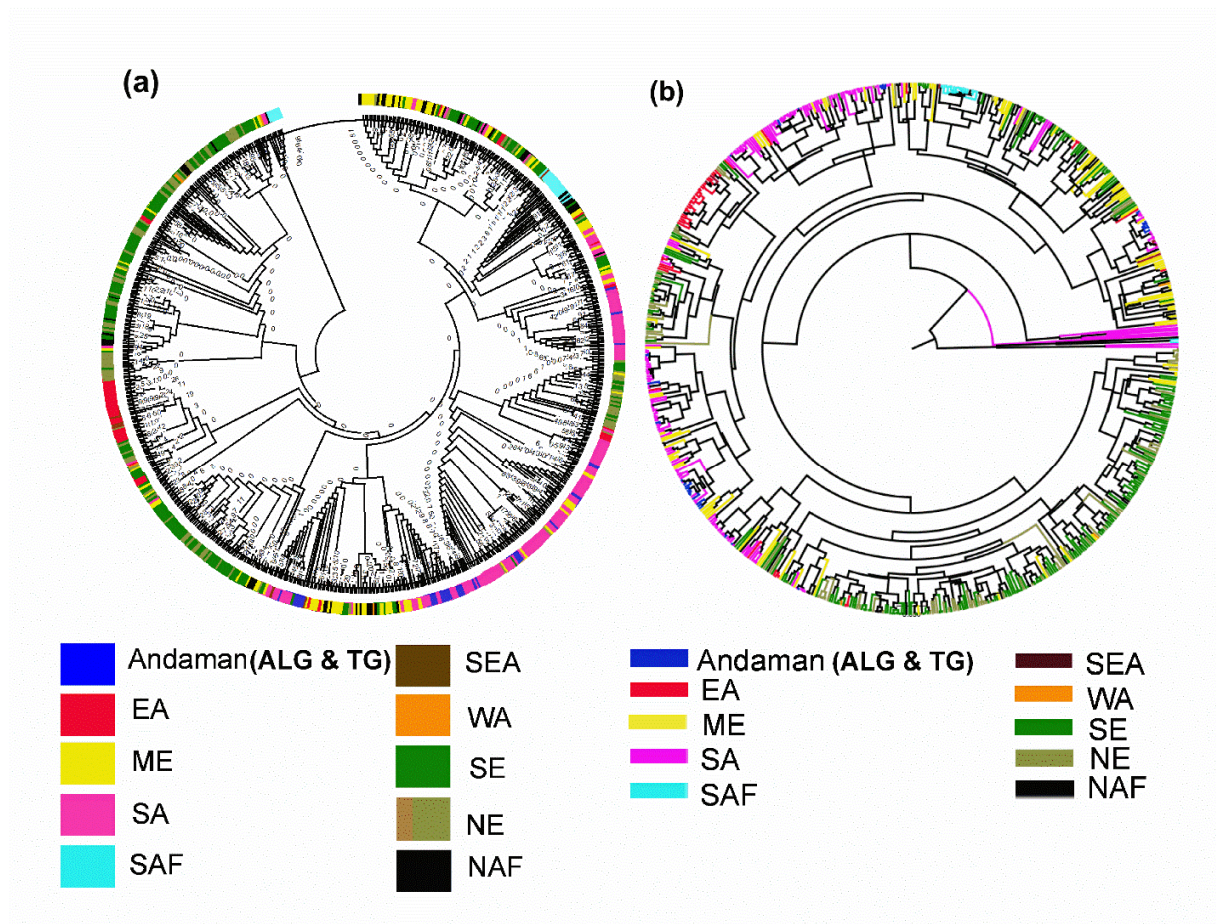

**Figure S3. Haplogroup A of Andaman goats and its relationship with A haplogroup goats of different regions** (a) Neighbor Joining (NJ) phylogenetic tree, (b) Bayesian phylogenetic tree. The Neighbor-Joining tree was constructed using Tamura-Nei model implemented in MEGAX [28] following 1,000 bootstrap replications, the Bayesian phylogenetic tree was drawn in BEAST v1.10.4 [33]. Analysis was done based on 481 bp hypervariable region (HV1) of mitochondrial D-loop.

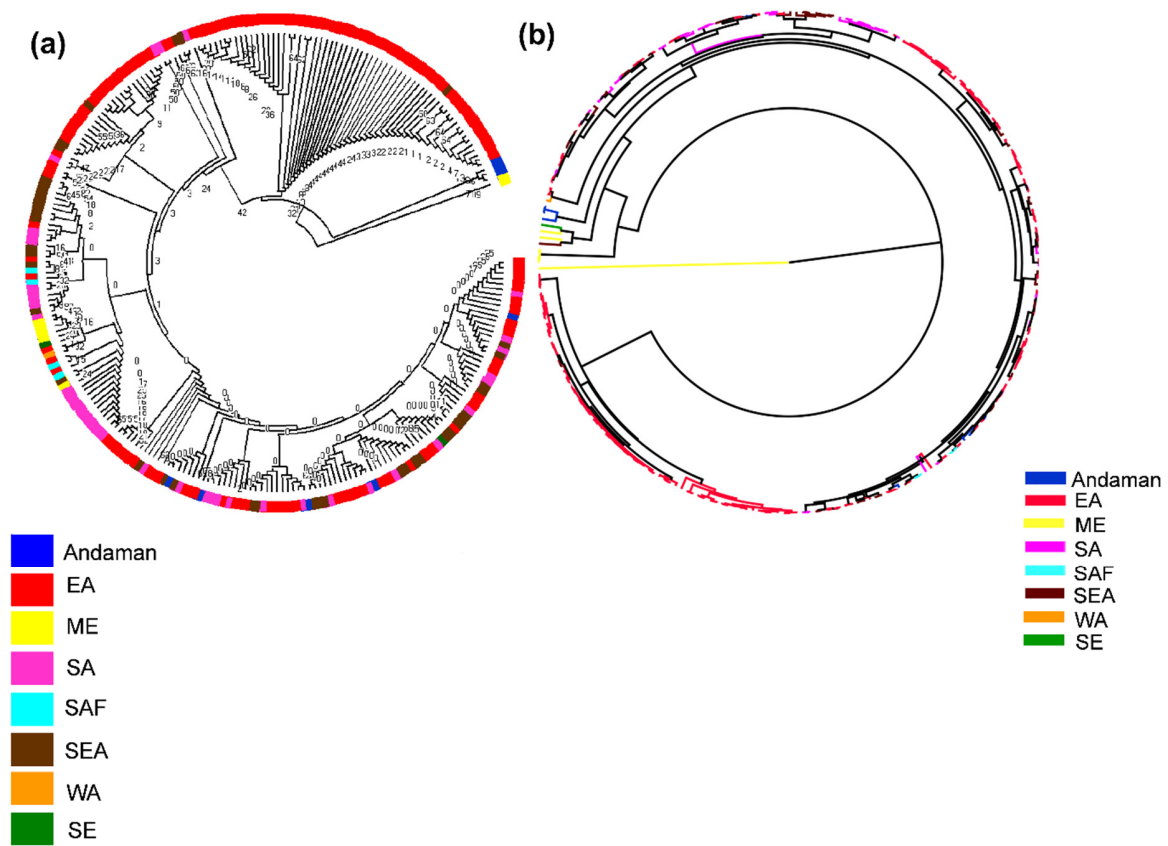

**Figure S4. Haplogroup B of Andaman goats and its relationship with B haplogroup goats of different regions** (a) Neighbor Joining (NJ) phylogenetic tree. (b) Bayesian phylogenetic tree. The Neighbor-Joining tree was constructed using Tamura-Nei model implemented in MEGAX [27] following 1,000 bootstrap replications and the Bayesian phylogenetic tree was drawn in BEAST v1.10.4 [32]. Analysis was done based on 481 bp hypervariable region (HV1) of mitochondrial D-loop.

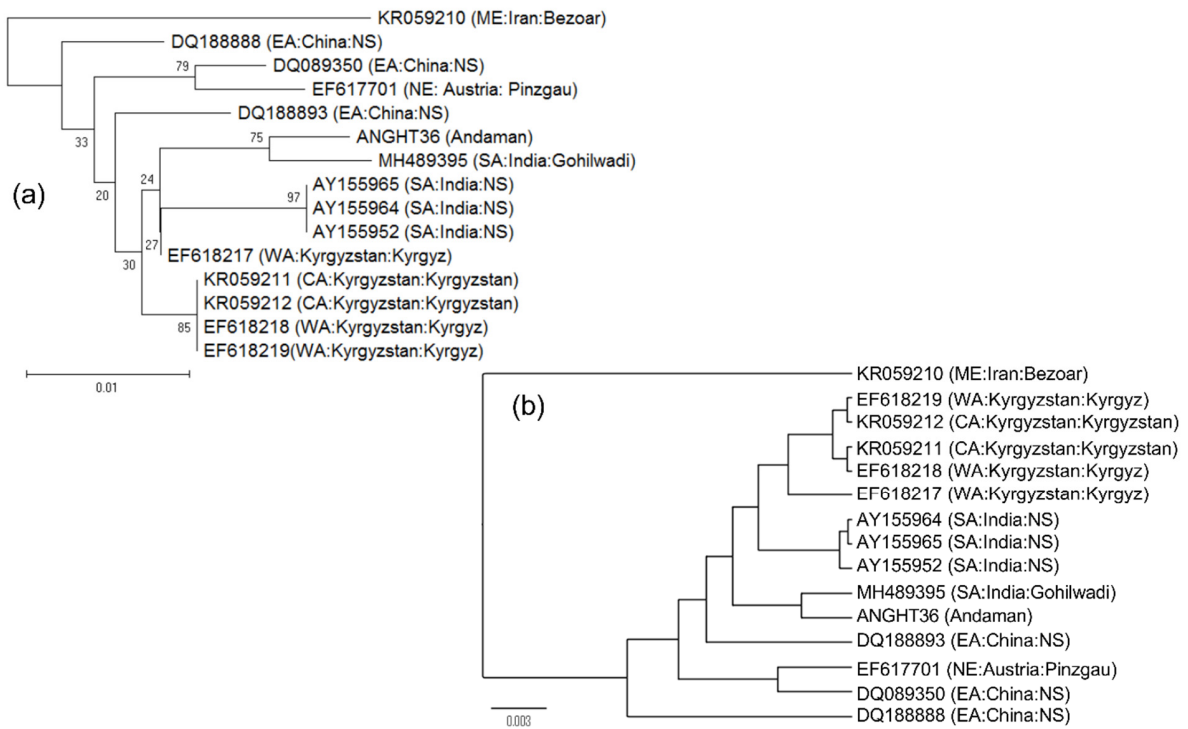

**Figure S5. Haplogroup D of Andaman goats and its relationship with D haplogroup goats of different regions** (a) Neighbor Joining (NJ) phylogenetic tree. (b) Bayesian phylogenetic tree. The Neighbor-Joining tree was constructed using Tamura-Nei model implemented in MEGAX [27] following 1,000 bootstrap replications and the Bayesian phylogenetic tree was drawn in BEAST v1.10.4 [32]. Analysis was done based on 481 bp hypervariable region (HV1) of mitochondrial D-loop.

**Table S1.** Sampling details of Andaman goats

| S. No.                        | Sampling Stations | Latitude      | Longitude     | Sampling No. |
|-------------------------------|-------------------|---------------|---------------|--------------|
| <b>Andaman local goat</b>     |                   |               |               |              |
| North & Middle Andaman (n=92) |                   |               |               |              |
| 1.                            | Shyam Nagar       | 92.93593473 N | 13.38970328 E | 3            |
| 2.                            | Radha Nagar       | 92.94638363 N | 13.37566189 E | 3            |
| 3.                            | Swarajgram        | 92.91562781 N | 13.32042218 E | 3            |
| 4.                            | Laxmipur          | 92.97373775 N | 13.28245757 E | 3            |
| 5.                            | Kishori Nagar     | 92.86566866 N | 13.24380604 E | 3            |
| 6.                            | Madhupur          | 92.97272349 N | 13.25591008 E | 3            |
| 7.                            | Keralapuram       | 92.97272349 N | 13.25591008 E | 3            |
| 8.                            | Ramakrishnagram   | 92.96659232 N | 13.25825047 E | 3            |
| 9.                            | Durgapur          | 93.01117534 N | 13.26017679 E | 3            |
| 10.                           | Krishnapuri       | 92.95276374 N | 13.2444902 E  | 3            |
| 11.                           | Subashgram        | 92.96265825 N | 13.23913419 E | 3            |
| 12.                           | Paranghara        | 92.89919957 N | 13.21459469 E | 3            |
| 13.                           | Nabagram          | 92.95365052 N | 13.2117868 E  | 3            |
| 14.                           | Kalighat          | 92.95693449 N | 13.12605033 E | 3            |
| 15.                           | Danpur            | 92.90596207 N | 12.90648728 E | 3            |
| 16.                           | Lucknow           | 92.8955822 N  | 12.85602022 E | 3            |
| 17.                           | Devpur            | 92.88448049 N | 12.8546306 E  | 3            |
| 18.                           | Rampur            | 92.91675028 N | 12.85694329 E | 3            |
| 19.                           | Webi              | 92.89332767 N | 12.83440262 E | 3            |
| 20.                           | Pahalgaon         | 92.87488235 N | 12.83234741 E | 3            |
| 21.                           | Tugapur           | 92.85392245 N | 12.83489173 E | 3            |
| 22.                           | Nimbudera         | 92.88582924 N | 12.7228287 E  | 3            |
| 23.                           | Billiground       | 92.89806781 N | 12.67872744 E | 3            |
| 24.                           | Dharmapur         | 92.90794967 N | 12.64394107 E | 3            |
| 25.                           | Kaushalyanagar    | 92.8843911 N  | 12.5459841 E  | 3            |
| 26.                           | Rangat            | 92.92169534 N | 12.51202038 E | 3            |
| 27.                           | Bharatpur         | 92.8921056 N  | 12.48814084 E | 3            |
| 28.                           | Bakultala         | 92.86766631 N | 12.5011245 E  | 3            |
| 29.                           | Kadamtala         | 92.79913261 N | 12.34046686 E | 3            |
| 30.                           | Adazig            | 92.7885048 N  | 12.2560715 E  | 2            |
| 31.                           | Kanchangarh       | 92.79272433 N | 12.18314678 E | 3            |
| South Andaman (n=45)          |                   |               |               |              |
| 32.                           | Wimberlygunj      | 92.70833817 N | 11.74389419 E | 3            |
| 33.                           | Mathura           | 92.69320865 N | 11.72619429 E | 3            |
| 34.                           | Ferrargunj        | 92.66118942 N | 11.72057477 E | 3            |

|                                                      |               |               |               |   |
|------------------------------------------------------|---------------|---------------|---------------|---|
| 35.                                                  | Bombooflat    | 92.68404218 N | 11.693658 E   | 3 |
| 36.                                                  | Tusnabad      | 92.64995016 N | 11.66952869 E | 3 |
| 37.                                                  | Bindraban     | 92.67145743 N | 11.71579361 E | 3 |
| 38.                                                  | Chouldari     | 92.66202795 N | 11.63791107 E | 3 |
| 39.                                                  | Wandoor       | 92.66623221 N | 11.6041036 E  | 3 |
| 40.                                                  | Manglutan     | 92.66366371 N | 11.58205794 E | 3 |
| 41.                                                  | Calicut       | 92.71995135 N | 11.59747988 E | 3 |
| 42.                                                  | Kamaraj Nagar | 92.72601824 N | 11.59948411 E | 3 |
| 43.                                                  | Prothrapur    | 92.73776512 N | 11.63014421 E | 3 |
| 44.                                                  | Nayashahar    | 92.68688682 N | 11.5798304 E  | 3 |
| 45.                                                  | Guptapara     | 92.66689237 N | 11.55928596 E | 3 |
| 46.                                                  | Manjery       | 92.66030049 N | 11.54659548 E | 3 |
| <b>Teresa goats: Nicobar group of Islands (n=48)</b> |               |               |               |   |
| 1.                                                   | Aloorang      | 93.11495699 N | 8.330705395 E | 4 |
| 2.                                                   | Bengali       | 93.12078675 N | 8.301399069 E | 4 |
| 3.                                                   | Haoin         | 93.10937168 N | 8.312291825 E | 4 |
| 4.                                                   | Kalasi        | 93.11045884 N | 8.289830662 E | 4 |
| 5.                                                   | Minyuk        | 93.13292739 N | 8.263474981 E | 4 |
| 6.                                                   | Luxi teressa  | 93.15034308 N | 8.225369793 E | 4 |
| 7.                                                   | Katchal       | 93.38357789 N | 8.011998694 E | 4 |
| 8.                                                   | Kapanga       | 93.39753987 N | 7.994153731 E | 4 |
| 9.                                                   | Sonomkuwa     | 93.39375703 N | 7.997173408 E | 4 |
| 10.                                                  | Hintona       | 93.3983573 N  | 7.916490285 E | 4 |
| 11.                                                  | Kamorta       | 93.49029766 N | 8.170999007 E | 4 |
| 12.                                                  | Champin       | 93.55425269 N | 8.01995522 E  | 4 |

---



**Table S2.** Sequences used in the present study

| Accession No.                                                                                                                                           | Region | Country     | Breed              |
|---------------------------------------------------------------------------------------------------------------------------------------------------------|--------|-------------|--------------------|
| <b>Haplogroup A</b>                                                                                                                                     |        |             |                    |
| MK139101-02,<br>MK139104-07,<br>MK139109-10,<br>MK139113-16,<br>MK139118-25,<br>MK139128-30,<br>MT747101-26,<br>MT747030-79<br>MN865073-79,<br>MN865081 | ISEA   | Andaman     | Andaman local goat |
| MK139132,<br>MT747147-59,<br>MK139136-37,<br>MK139140,<br>MT747160-64                                                                                   | ISEA   | Andaman     | Teressa Goat       |
| AJ317545-52                                                                                                                                             | EA     | Mongolia    | ND                 |
| DQ217780-85                                                                                                                                             | EA     | South Korea | ND                 |
| AY860871-80                                                                                                                                             | EA     | China       | ND                 |
| AY860882-87                                                                                                                                             | EA     | China       | ND                 |
| AY860893-93                                                                                                                                             | EA     | China       | ND                 |
| AY860895-98                                                                                                                                             | EA     | China       | ND                 |
| AY860900                                                                                                                                                | EA     | China       | ND                 |
| AY860902                                                                                                                                                | EA     | China       | ND                 |
| AY860905-06                                                                                                                                             | EA     | China       | ND                 |
| AY860908-13                                                                                                                                             | EA     | China       | ND                 |
| AY860915-16                                                                                                                                             | EA     | China       | ND                 |
| AY860919-21                                                                                                                                             | EA     | China       | ND                 |
| AY860923                                                                                                                                                | EA     | China       | ND                 |
| AY860925-32                                                                                                                                             | EA     | China       | ND                 |
| AY860934-42                                                                                                                                             | EA     | China       | ND                 |
| DQ188849-56                                                                                                                                             | EA     | China       | ND                 |
| DQ188858-59                                                                                                                                             | EA     | China       | ND                 |
| DQ188861-72                                                                                                                                             | EA     | China       | ND                 |
| DQ188874-77                                                                                                                                             | EA     | China       | ND                 |
| DQ188879-85                                                                                                                                             | EA     | China       | ND                 |
| DQ188887                                                                                                                                                | EA     | China       | ND                 |
| DQ188889                                                                                                                                                | EA     | China       | ND                 |
| DQ188894-95                                                                                                                                             | EA     | China       | ND                 |
| DQ188897-903                                                                                                                                            | EA     | China       | ND                 |
| DQ121491-99                                                                                                                                             | EA     | China       | ND                 |
| DQ121501-03                                                                                                                                             | EA     | China       | ND                 |
| DQ121505-13                                                                                                                                             | EA     | China       | ND                 |
| DQ121518-27                                                                                                                                             | EA     | China       | ND                 |
| DQ121531-34                                                                                                                                             | EA     | China       | ND                 |



|              |    |       |    |
|--------------|----|-------|----|
| DQ121536     | EA | China | ND |
| DQ121540-41  | EA | China | ND |
| DQ121543-48  | EA | China | ND |
| DQ121550-64  | EA | China | ND |
| DQ121568     | EA | China | ND |
| DQ121572-77  | EA | China | ND |
| DQ121580     | EA | China | ND |
| DQ121582-84  | EA | China | ND |
| DQ121586-90  | EA | China | ND |
| DQ121592-96  | EA | China | ND |
| DQ121599-609 | EA | China | ND |
| DQ121613-15  | EA | China | ND |
| DQ121617-18  | EA | China | ND |
| AY853278-86  | EA | China | ND |
| AY853288-90  | EA | China | ND |
| AY853293     | EA | China | ND |
| AY853296-99  | EA | China | ND |
| DQ089106-11  | EA | China | ND |
| DQ089113-14  | EA | China | ND |
| DQ089116-17  | EA | China | ND |
| DQ089119-23  | EA | China | ND |
| DQ089125-28  | EA | China | ND |
| DQ089130-33  | EA | China | ND |
| DQ089135-37  | EA | China | ND |
| DQ089139-48  | EA | China | ND |
| DQ089151-53  | EA | China | ND |
| DQ089155-57  | EA | China | ND |
| DQ089161     | EA | China | ND |
| DQ089164-75  | EA | China | ND |
| DQ089177-78  | EA | China | ND |
| DQ089180     | EA | China | ND |
| DQ089182     | EA | China | ND |
| DQ089186     | EA | China | ND |
| DQ089189-90  | EA | China | ND |
| DQ089194     | EA | China | ND |
| DQ089198     | EA | China | ND |
| DQ089200     | EA | China | ND |
| DQ089202-04  | EA | China | ND |
| DQ089206     | EA | China | ND |
| DQ089208     | EA | China | ND |
| DQ089210-13  | EA | China | ND |
| DQ089216-17  | EA | China | ND |
| DQ089219-22  | EA | China | ND |
| DQ089224-25  | EA | China | ND |
| DQ089228     | EA | China | ND |
| DQ089230     | EA | China | ND |
| DQ089232-34  | EA | China | ND |
| DQ089236-39  | EA | China | ND |

|              |    |              |            |
|--------------|----|--------------|------------|
| DQ089242-44  | EA | China        | ND         |
| DQ089246-48  | EA | China        | ND         |
| DQ089250     | EA | China        | ND         |
| DQ089252-55  | EA | China        | ND         |
| DQ089259     | EA | China        | ND         |
| DQ089262-63  | EA | China        | ND         |
| DQ089265-66  | EA | China        | ND         |
| DQ089271     | EA | China        | ND         |
| DQ089274-75  | EA | China        | ND         |
| DQ089277     | EA | China        | ND         |
| DQ089280-82  | EA | China        | ND         |
| DQ089284     | EA | China        | ND         |
| DQ089286-94  | EA | China        | ND         |
| DQ089297-99  | EA | China        | ND         |
| DQ089303     | EA | China        | ND         |
| DQ089309-49  | EA | China        | ND         |
| DQ089351-56  | EA | China        | ND         |
| DQ089359-62  | EA | China        | ND         |
| DQ089365     | EA | China        | ND         |
| DQ089367-68  | EA | China        | ND         |
| DQ089370-73  | EA | China        | ND         |
| DQ089375-76  | EA | China        | ND         |
| DQ089379-95  | EA | China        | ND         |
| DQ089397-402 | EA | China        | ND         |
| DQ089406     | EA | China        | ND         |
| DQ089409     | EA | China        | ND         |
| DQ089414-20  | EA | China        | ND         |
| DQ089422-59  | EA | China        | ND         |
| DQ089462-73  | EA | China        | ND         |
| AJ317569-70  | EA | China        | ND         |
| EF618234-39  | EA | Mongolia     | ND         |
| AJ317762-68  | ME | Iraq         | ND         |
| AJ317769-73  | ME | Jordan       | ND         |
| KR059184     | ME | Saudi Arabia | ND         |
| AJ317760-61  | ME | Syria        | ND         |
| AJ317736-51  | ME | Turkey       | ND         |
| AJ317842-43  | ME | Turkey       | ND         |
| AJ317752-59  | ME | Saudi Arabia | ND         |
| KR059153     | ME | Jordan       | Baladie    |
| KR059154     | ME | Saudi Arabia | Najrani    |
| KR059158     | ME | Turkey       | Hair       |
| KR059160     | ME | Jordan       | Baladie    |
| KR059161     | ME | Turkey       | Gurku      |
| KR059179     | ME | Turkey       | Abaza      |
| KR059183     | ME | Jordan       | Baladie    |
| KR059184     | ME | Saudi_Arabia | Beshi      |
| KR059186     | ME | Turkey       | Abaza      |
| KR059189     | ME | Iran         | Kermanshah |

|             |    |        |               |
|-------------|----|--------|---------------|
| KR059191    | ME | Iran   | Kurdi         |
| KR059192    | ME | Iran   | Naini         |
| KR059199    | ME | Turkey | Abaza         |
| KR059200-02 | ME | Turkey | Angora        |
| KR059203    | ME | Turkey | Gurku         |
| KR059204    | ME | Turkey | Hair          |
| KR059206    | ME | Iran   | Taleshi       |
| KR059207-08 | ME | Iran   | Kermanshah    |
| KR059253-66 | ME | Iran   | Native Abadeh |
| KR059503    | ME | Iran   | Native Qazvin |
| KR059504    | ME | Iran   | Taleshi       |
| KR059505    | ME | Iran   | Kuhaki        |
| KR059506    | ME | Iran   | Turki         |
| KR059507    | ME | Iran   | Native Qazvin |
| KR059508-11 | ME | Iran   | Taleshi       |
| KR059512    | ME | Iran   | Khalkhali     |
| KR059513    | ME | Iran   | Turki         |
| KR059514    | ME | Iran   | Native Qazvin |
| KR059515-16 | ME | Iran   | Taleshi       |
| KR059517    | ME | Iran   | Kuhaki        |
| KR059518    | ME | Iran   | Turki         |
| KR059519    | ME | Iran   | Native Qazvin |
| KR059520    | ME | Iran   | Turki         |
| KR059521    | ME | Iran   | Native Qazvin |
| KR059522-23 | ME | Iran   | Taleshi       |
| KR059524    | ME | Iran   | Kuhaki        |
| KR059525    | ME | Iran   | Naini         |
| KR059526    | ME | Iran   | Turki         |
| KR059527    | ME | Iran   | Native Qazvin |
| KR059528    | ME | Iran   | Turki         |
| KR059529    | ME | Iran   | Kuhaki        |
| KR059530-31 | ME | Iran   | Turki         |
| KR059532    | ME | Iran   | Native Qazvin |
| KR059533-35 | ME | Iran   | Kuhaki        |
| KR059536-37 | ME | Iran   | Morkhoj       |
| KR059538    | ME | Iran   | Kuhaki        |
| KR059539-41 | ME | Iran   | Morkhoj       |
| KR059542-43 | ME | Iran   | Kuhaki        |
| KR059544-45 | ME | Iran   | Morkhoj       |
| KR059546    | ME | Iran   | Kuhaki        |
| KR059547    | ME | Iran   | Morkhoj       |
| KR059548    | ME | Iran   | Kuhaki        |
| KR059550-52 | ME | Iran   | Morkhoj       |
| KR059553    | ME | Iran   | Kuhaki        |
| KR059556    | ME | Iran   | Kuhaki        |
| KR059557    | ME | Iran   | Morkhoj       |
| KR059558    | ME | Iran   | Kuhaki        |
| KR059559    | ME | Iran   | Morkhoj       |

|               |     |              |                     |
|---------------|-----|--------------|---------------------|
| KR059603-05   | ME  | Jordan       | Baladie             |
| KR059616-23   | ME  | Saudi Arabia | Beshi               |
| KR059624-27   | ME  | Saudi Arabia | Najrani             |
| KR059660-64   | ME  | Turkey       | Abaza               |
| KR059665-68   | ME  | Turkey       | Angora              |
| KR059670-74   | ME  | Turkey       | Angora              |
| KR059675-81   | ME  | Turkey       | Gurku               |
| KR059682-89   | ME  | Turkey       | Hair                |
| KR059704-18   | ME  | Iran         | Khalkhali           |
| KR059733-38   | ME  | Iran         | Morkhoj             |
| KR059750      | ME  | Iran         | Naini               |
| EF617863-67   | ME  | Iran         | ND                  |
| EF617868      | ME  | Iran         | Morkhoj             |
| EF617869      | ME  | Iran         | ND                  |
| EF617870-71   | ME  | Iran         | Morkhoj             |
| EF617872      | ME  | Iran         | ND                  |
| EF617873      | ME  | Iran         | Morghoz             |
| EF617874      | ME  | Iran         | NS                  |
| EF617875      | ME  | Iran         | Morghoz             |
| EF617876-901  | ME  | Iran         | ND                  |
| EF618191-204  | ME  | Jordan       | Baladi              |
| EF617902-74   | ME  | Iran         | ND                  |
| EF617975-8001 | ME  | Iran         | Kurdi               |
| EF618003-07   | ME  | Iran         | Kurdi               |
| EF618008-16   | ME  | Iran         | Indeterminate breed |
| EF618017-56   | ME  | Iran         | Raini               |
| EF618057-67   | ME  | Iran         | Indeterminate breed |
| EF618068-69   | ME  | Iran         | Morghoz             |
| EF618309-14   | ME  | Saudi Arabia | Beeshi              |
| EF618315-21   | ME  | Saudi Arabia | Najrani             |
| EF618322-30   | ME  | Saudi Arabia | Beeshi              |
| EF618331-40   | ME  | Saudi Arabia | Najrani             |
| EF618492-96   | ME  | Turkey       | Abaza               |
| EF618497      | ME  | Turkey       | Angora goat         |
| EF618498-504  | ME  | Turkey       | Gurcu               |
| EF618505-06   | ME  | Turkey       | Hair                |
| EF618507-14   | ME  | Turkey       | Abaza               |
| EF618515-22   | ME  | Turkey       | Angora goat         |
| EF618523-26   | ME  | Turkey       | Gurcu               |
| EF618527-34   | ME  | Turkey       | Hair                |
| KR059751-64   | ME  | Iran         | Naini               |
| KR059765-70   | ME  | Iran         | Najdi               |
| KR059771-76   | ME  | Iran         | Raini               |
| KR059816-17   | ME  | Iran         | Taleshi             |
| KR059820-28   | ME  | Iran         | Taleshi             |
| KR059829-40   | ME  | Iran         | Turki               |
| KR059842-43   | ME  | Iran         | Turki               |
| AJ317777-79   | NAF | Algeria      | ND                  |

|              |     |             |                    |
|--------------|-----|-------------|--------------------|
| AJ317780-83  | NAF | Egypt       | ND                 |
| AJ317795-801 | NAF | Egypt       | ND                 |
| AJ317784-88  | NAF | Morocco     | ND                 |
| AJ317810-11  | NAF | Nigeria     | ND                 |
| AJ317823-25  | NAF | Nigeria     | ND                 |
| AJ317789-94  | NAF | Tunisia     | ND                 |
| AJ317816-18  | NAF | Senegal     | ND                 |
| KR059155     | NAF | Egypt       | Zaraibi            |
| KR059157     | NAF | Spain       | Zaraibi            |
| KR059159     | NAF | Egypt       | Zaraibi            |
| KR059188     | NAF | Egypt       | Zaraibi            |
| KR059227-28  | NAF | Egypt       | Barki              |
| KR059229     | NAF | Egypt       | Zaraibi            |
| KR059230     | NAF | Egypt       | Barki              |
| KR059231     | NAF | Egypt       | Zaraibi            |
| KR059232     | NAF | Egypt       | Barki              |
| KR059233     | NAF | Egypt       | Zaraibi            |
| KR059234     | NAF | Egypt       | Barki              |
| KR059235     | NAF | Egypt       | Zaraibi            |
| KR059236     | NAF | Egypt       | Barki              |
| KR059237     | NAF | Egypt       | Zaraibi            |
| KR059238     | NAF | Egypt       | Barki              |
| KR059239     | NAF | Egypt       | Zaraibi            |
| KR059240     | NAF | Egypt       | Barki              |
| KR059241     | NAF | Egypt       | Zaraibi            |
| KR059242     | NAF | Egypt       | Zaraibi            |
| KR059243     | NAF | Egypt       | Barki              |
| KR059244-51  | NAF | Egypt       | Zaraibi            |
| KR059252     | NAF | Egypt       | Barki              |
| KR059271-304 | NAF | Egypt       | Barki              |
| EF617711-26  | NAF | Egypt       | Baladi             |
| EF618220     | NAF | Libya       | ND                 |
| EF618233     | NAF | Morocco     | Moroccan Black     |
| EF618246-52  | NAF | Nigeria     | West African Dwarf |
| KR059777     | NAF | Egypt       | Saidi              |
| KR059779-813 | NAF | Egypt       | Saidi              |
| KR059815     | NAF | Egypt       | Saidi              |
| KR059844-51  | NAF | Egypt       | Zaraibi            |
| KR059778     | NAF | Egypt       | Saidi              |
| AJ317650     | NE  | Denmark     | ND                 |
| AJ317592     | NE  | England     | ND                 |
| AJ317841     | NE  | England     | ND                 |
| AJ317573-74  | NE  | Switzerland | ND                 |
| AJ317596-99  | NE  | Switzerland | ND                 |
| AJ317605     | NE  | Switzerland | ND                 |
| AJ317619-24  | NE  | Switzerland | ND                 |
| AJ317760-61  | NE  | Switzerland | ND                 |
| AJ317600-04  | NE  | Ukraine     | ND                 |

|              |    |             |                        |
|--------------|----|-------------|------------------------|
| AJ317655-58  | NE | Wales       | ND                     |
| AJ317575-83  | NE | France      | ND                     |
| AJ317713-19  | NE | France      | ND                     |
| AJ317723-25  | NE | France      | ND                     |
| AJ317629-30  | NE | France      | ND                     |
| AJ317586-649 | NE | Germany     | ND                     |
| AJ317587-91  | NE | Iceland     | ND                     |
| AJ317593-95  | NE | Norway      | ND                     |
| AJ317584-85  | NE | Poland      | ND                     |
| AJ317651-52  | NE | Poland      | ND                     |
| AJ317653-54  | NE | Slovakia    | ND                     |
| AJ317731     | NE | Slovenia    | ND                     |
| AJ317637     | NE | Sweden      | ND                     |
| AJ317626     | NE | Switzerland | ND                     |
| AJ317631-35  | NE | Switzerland | ND                     |
| AJ317638-48  | NE | Switzerland | ND                     |
| KR059147     | NE | Switzerland | Valais Black Neck      |
| KR059150     | NE | Switzerland | Grisons Striped        |
| KR059172     | NE | Switzerland | Peacock goat           |
| KR059181     | NE | Switzerland | Swiss Alpine           |
| KR059185     | NE | France      | Alpine                 |
| KR059194     | NE | Germany     | Thuringian Forest Goat |
| KR059342-54  | NE | Austria     | Pinzgau                |
| KR059355-64  | NE | Austria     | Tauern Pied            |
| KR059365-71  | NE | Switzerland | Swiss Alpine           |
| KR059372-76  | NE | Switzerland | Grisons Striped        |
| KR059377-83  | NE | Switzerland | Peacock goat           |
| KR059384-92  | NE | Switzerland | St Gallen Booted goat  |
| KR059393-97  | NE | Switzerland | Valais Black Neck      |
| KR059398-407 | NE | Germany     | German Alpine goat     |
| KR059408-23  | NE | Germany     | Thuringian Forest Goat |
| KR059424     | NE | France      | Alpine                 |
| KR059426-29  | NE | France      | Alpine                 |
| KR059431-32  | NE | France      | Alpine                 |
| KR059433-43  | NE | France      | Corse                  |
| KR059444-57  | NE | France      | Pireneene              |
| KR059458-72  | NE | France      | Rove                   |
| KR059606-10  | NE | Poland      | Brava                  |
| EF617710     | NE | Denmark     | Wallis                 |
| EF617729     | NE | England     | Kielder                |
| EF618542     | NE | Wales       | Ramshill Isack         |
| EF618543     | NE | Wales       | Wild goat              |
| EF618544     | NE | Wales       | ND                     |
| EF618540     | NE | Ukraine     | Orienberg              |
| EF617851     | NE | Iceland     | Kjarni                 |
| EF617852     | NE | Iceland     | Iceland Landrace       |
| EF617853     | NE | Iceland     | Denso                  |
| EF617854     | NE | Iceland     | Stjaa                  |

|               |    |             |                   |
|---------------|----|-------------|-------------------|
| EF617855      | NE | Iceland     | Hafdis            |
| EF618085-86   | NE | Ireland     | Irish Island      |
| EF618346      | NE | Slovenia    | Bovska            |
| EF618415-22   | NE | Sweden      | Suede Landrace    |
| EF617601      | NE | Austria     | Pinzgau           |
| EF617679-81   | NE | Austria     | Pinzgau           |
| EF617682-84   | NE | Austria     | Tauern Pied       |
| EF617685-91   | NE | Austria     | Pinzgau           |
| EF617692-99   | NE | Austria     | Tauern Pied       |
| EF617700      | NE | Austria     | Pinzgau           |
| EF617730-31   | NE | France      | Rove              |
| EF617732-37   | NE | France      | French Alpine     |
| EF617738-42   | NE | France      | Corse             |
| EF617743-45   | NE | France      | Pyrene            |
| EF617746-51   | NE | France      | Rove              |
| EF617752-54   | NE | France      | Poitou Poitevine  |
| EF617755-61   | NE | France      | Corse             |
| EF617762-69   | NE | France      | Pyrene            |
| EF617770-77   | NE | France      | Rove              |
| EF617778-85   | NE | France      | French Alpine     |
| EF618423-24   | NE | Switzerland | Grison Striped    |
| EF618425-27   | NE | Switzerland | Peacock Goat      |
| EF618428      | NE | Switzerland | Saanen            |
| EF618429      | NE | Switzerland | Valais blackneck  |
| EF618430-34   | NE | Switzerland | Toggenburg        |
| EF618435-42   | NE | Switzerland | Suiss Alpine      |
| EF618443-48   | NE | Switzerland | Grison Striped    |
| EF618449-54   | NE | Switzerland | Peacock Goat      |
| EF618455-56   | NE | Switzerland | St. Gallen booted |
| EF618457-61   | NE | Switzerland | Suiss Alpine      |
| EF618462-69   | NE | Switzerland | Grison Striped    |
| EF618470-77   | NE | Switzerland | Peacock Goat      |
| EF618478-83   | NE | Switzerland | St. Gallen booted |
| EF618484-85   | NE | Switzerland | Suiss Alpine      |
| EF617788-94   | NE | Germany     | German Alpine     |
| EF617795-807  | NE | Germany     | Thuringian Forest |
| EF617809-15   | NE | Germany     | German Alpine     |
| EF618264-70   | NE | Poland      | Brava             |
| EF618271-86   | NE | Poland      | Buk               |
| MH489263-74   | SA | India       | Attapady          |
| MH489322-23   | SA | India       | Attapady          |
| MH489315-21   | SA | India       | Bidri             |
| KP671449-56   | SA | India       | Kodi Adu          |
| MH489305-13   | SA | India       | Berari            |
| JX271775-78   | SA | India       | Zalawadi          |
| KC818086-8105 | SA | India       | Zalawadi          |
| MH489241-54   | SA | India       | Zalawadi          |
| JX271772-74   | SA | India       | Surti             |



|               |    |       |              |
|---------------|----|-------|--------------|
| JX271768-69   | SA | India | Surti        |
| JX271763-66   | SA | India | Surti        |
| JX271750-62   | SA | India | Sirohi       |
| KC818063-85   | SA | India | Sirohi       |
| KX274337-46   | SA | India | Sirohi       |
| JX271739-49   | SA | India | Sangamneri   |
| KX274357-66   | SA | India | Sangamneri   |
| JX271729-38   | SA | India | Osmanabadi   |
| KC818028-38   | SA | India | Osmanabadi   |
| KX274347-56   | SA | India | Osmanabadi   |
| JX271727-28   | SA | India | Mehsana      |
| KC818011-27   | SA | India | Mehsana      |
| JX271717-26   | SA | India | Marwari      |
| KC817992-8010 | SA | India | Marwari      |
| JX271711-15   | SA | India | Malabari     |
| JX271707-09   | SA | India | Malabari     |
| KC817976-91   | SA | India | Malabari     |
| JX271701-06   | SA | India | Kutchi       |
| JX271697-99   | SA | India | Kutchi       |
| JX271700      | SA | India | Kutchi       |
| JX271685-96   | SA | India | Kanniadu     |
| JX271676-78   | SA | India | Jamunapari   |
| JX271666-73   | SA | India | Jamunapari   |
| KX274367-76   | SA | India | Jamunapari   |
| MH489430      | SA | India | Jamunapari   |
| MH489427-28   | SA | India | Jamunapari   |
| MH489420-25   | SA | India | Jamunapari   |
| KP671321-61   | SA | India | Jamunapari   |
| JX271674      | SA | India | Jamunapari   |
| MH489426      | SA | India | Jamunapari   |
| MH489410-19   | SA | India | Jakhana      |
| JX271651-63   | SA | India | Gohilwadi    |
| KC817924-47   | SA | India | Gohilwadi    |
| MH489396-402  | SA | India | Gohilwadi    |
| MH489387-94   | SA | India | Gohilwadi    |
| JX271649-50   | SA | India | Ganjam       |
| JX271643-47   | SA | India | Ganjam       |
| KC817907-23   | SA | India | Ganjam       |
| JX271640-42   | SA | India | Gaddi        |
| KC817883-906  | SA | India | Gaddi        |
| JX271637-39   | SA | India | Chegu        |
| MH489355-66   | SA | India | Chegu        |
| JX271627-36   | SA | India | Changthangi  |
| KC817863-82   | SA | India | Changthangi  |
| JX271620-25   | SA | India | Black Bengal |
| JX271617-18   | SA | India | Black Bengal |
| JX271612-13   | SA | India | Black Bengal |
| KC817843-62   | SA | India | Black Bengal |

|               |    |          |              |
|---------------|----|----------|--------------|
| DQ521881-86   | SA | India    | Black Bengal |
| DQ521879-80   | SA | India    | Black Bengal |
| DQ521871-78   | SA | India    | Black Bengal |
| JX271614      | SA | India    | Black Bengal |
| JX271616      | SA | India    | Black Bengal |
| JX271604-11   | SA | India    | Beetal       |
| JX271601-02   | SA | India    | Beetal       |
| KC817830-42   | SA | India    | Beetal       |
| JX271599-600  | SA | India    | Barbari      |
| JX271587-97   | SA | India    | Barbari      |
| KC817816-23   | SA | India    | Barbari      |
| KC817825-29   | SA | India    | Barbari      |
| AB162213      | SA | India    | Barbari      |
| AB110583-84   | SA | India    | Barbari      |
| KX274327-34   | SA | India    | Barbari      |
| EF617856-62   | SA | India    | Ragestan     |
| AJ317856-57   | SA | India    | ND           |
| AJ317540-44   | SA | India    | ND           |
| AJ317560-62   | SA | India    | ND           |
| AJ317571-72   | SA | India    | ND           |
| AY155674-81   | SA | India    | ND           |
| AY155683-707  | SA | India    | ND           |
| AY155709-833  | SA | India    | ND           |
| AY155835-79   | SA | India    | ND           |
| AY155881-82   | SA | India    | ND           |
| AY155884-951  | SA | India    | ND           |
| AY155953-63   | SA | India    | ND           |
| AY155966-93   | SA | India    | ND           |
| AY155995-6008 | SA | India    | ND           |
| AY156010-39   | SA | India    | ND           |
| MG923212-26   | SA | India    | ND           |
| MG923228-45   | SA | India    | ND           |
| MG923247-48   | SA | India    | ND           |
| MG923250-58   | SA | India    | ND           |
| MG923260-66   | SA | India    | ND           |
| MG923268-71   | SA | India    | ND           |
| MG923273-95   | SA | India    | ND           |
| MG923297-98   | SA | India    | ND           |
| MG923300-15   | SA | India    | ND           |
| AJ317533      | SA | Pakistan | ND           |
| AJ317539      | SA | Pakistan | ND           |
| AJ317554-55   | SA | Pakistan | ND           |
| AJ317557-59   | SA | Pakistan | ND           |
| AJ317563-65   | SA | Pakistan | ND           |
| AJ317845-50   | SA | Pakistan | ND           |
| AJ317861-63   | SA | Pakistan | ND           |
| AB110552-53   | SA | Pakistan | Tapri        |
| AB110557-58   | SA | Pakistan | Patri        |

|             |     |              |                |
|-------------|-----|--------------|----------------|
| AB110560-63 | SA  | Pakistan     | Pak Angora     |
| AB110565-66 | SA  | Pakistan     | Nachi          |
| AB110567-69 | SA  | Pakistan     | Lehri          |
| AB110570    | SA  | Pakistan     | Long Hairry    |
| AB110572-74 | SA  | Pakistan     | Kohistani      |
| AB110575-78 | SA  | Pakistan     | Khurawsani     |
| AB110579    | SA  | Pakistan     | Kamori         |
| AB110580-82 | SA  | Pakistan     | Dera Din Panah |
| AB110583-84 | SA  | Pakistan     | Barbari        |
| AB110585-88 | SA  | Pakistan     | Beetal         |
| AB110589    | SA  | Pakistan     | Tapri          |
| EF618253    | SA  | Pakistan     | Beetal         |
| EF618254    | SA  | Pakistan     | Dera Dinpanah  |
| AJ317851-55 | SA  | Bhutan       | ND             |
| AJ317804-09 | SAF | Mozambique   | ND             |
| AJ317812-15 | SAF | South Africa | ND             |
| AJ317819-22 | SAF | South Africa | ND             |
| AJ317802-03 | SAF | Zimbabwe     | ND             |
| EF618240-41 | SAF | Mozambique   | Pafuri         |
| EF618242    | SAF | Namibia      | Kaoko          |
| EF618243    | SAF | Namibia      | Owambo         |
| EF618244    | SAF | Namibia      | Kaoko          |
| EF618245    | SAF | Namibia      | Owambo         |
| EF618351    | SAF | South Africa | ND             |
| EF618352    | SAF | South Africa | Tsawana        |
| EF618353-54 | SAF | South Africa | Venda          |
| EF618545-46 | SAF | Zimbabwe     | Matabelle      |
| AY961629    | SE  | Portugal     | Serrana        |
| AY961630-33 | SE  | Portugal     | Algarvia       |
| AY961634-43 | SE  | Portugal     | Serpentina     |
| AY961645    | SE  | Portugal     | Bravia         |
| AY961646    | SE  | Portugal     | Serrana        |
| AY961647-48 | SE  | Portugal     | Bravia         |
| AY961649-52 | SE  | Portugal     | Algarvia       |
| AY961653    | SE  | Portugal     | Bravia         |
| AY961654-55 | SE  | Portugal     | Serpentina     |
| AY961656-57 | SE  | Portugal     | Bravia         |
| AY961658    | SE  | Portugal     | Algarvia       |
| AY961659    | SE  | Portugal     | Serrana        |
| AY961660    | SE  | Portugal     | Serpentina     |
| AY961661    | SE  | Portugal     | Bravia         |
| AY961662    | SE  | Portugal     | Charnequeira   |
| AY961663-64 | SE  | Portugal     | Serpentina     |
| AY961665-67 | SE  | Portugal     | Bravia         |
| AY961668    | SE  | Portugal     | Serrana        |
| AY961669-70 | SE  | Portugal     | Serpentina     |
| AY961671-73 | SE  | Portugal     | Bravia         |
| AY961674-75 | SE  | Portugal     | Algarvia       |

|             |    |          |              |
|-------------|----|----------|--------------|
| AY961676-79 | SE | Portugal | Charnequeira |
| AY961680    | SE | Portugal | Serrana      |
| AY961681    | SE | Portugal | Bravia       |
| AY961682    | SE | Portugal | Algarvia     |
| AY961683-86 | SE | Portugal | Charnequeira |
| AY961687-93 | SE | Portugal | Serrana      |
| AY961694    | SE | Portugal | Bravia       |
| AY961695    | SE | Portugal | Serpentina   |
| AY961696-97 | SE | Portugal | Bravia       |
| AY961700    | SE | Portugal | Charnequeira |
| AY961701-02 | SE | Portugal | Serrana      |
| AY961703    | SE | Portugal | Charnequeira |
| AY961704-06 | SE | Portugal | Serrana      |
| AY961707    | SE | Portugal | Bravia       |
| AY961708-09 | SE | Portugal | Serrana      |
| AY961710-16 | SE | Portugal | Bravia       |
| AY961717    | SE | Portugal | Algarvia     |
| AY961718    | SE | Portugal | Bravia       |
| AY961719    | SE | Portugal | Serpentina   |
| AY961720    | SE | Portugal | Bravia       |
| AY961721-23 | SE | Portugal | Algarvia     |
| AY961724-25 | SE | Portugal | Serpentina   |
| AY961726    | SE | Portugal | Algarvia     |
| AY961727    | SE | Portugal | Bravia       |
| AY961728    | SE | Portugal | Serrana      |
| AY961729-30 | SE | Portugal | Serpentina   |
| AY961731-36 | SE | Portugal | Bravia       |
| AY961737-38 | SE | Portugal | Serrana      |
| AY961739    | SE | Portugal | Algarvia     |
| AY961740    | SE | Portugal | Charnequeira |
| AY961741    | SE | Portugal | Serrana      |
| AY961742-44 | SE | Portugal | Bravia       |
| AY961745    | SE | Portugal | Serrana      |
| AY961746    | SE | Portugal | Serpentina   |
| AY961747    | SE | Portugal | Charnequeira |
| AY961748-51 | SE | Portugal | Serrana      |
| AY961752-53 | SE | Portugal | Serpentina   |
| AY961754-57 | SE | Portugal | Serrana      |
| AY961758    | SE | Portugal | Bravia       |
| AY961759    | SE | Portugal | Serpentina   |
| AY961760    | SE | Portugal | Serrana      |
| AY961761    | SE | Portugal | Serpentina   |
| AY961762-63 | SE | Portugal | Bravia       |
| AY961764-66 | SE | Portugal | Serrana      |
| AY961767-68 | SE | Portugal | Algarvia     |
| AY961769-70 | SE | Portugal | Serpentina   |
| AY961771    | SE | Portugal | Charnequeira |
| AY961772-73 | SE | Portugal | Algarvia     |

|              |    |          |              |
|--------------|----|----------|--------------|
| AY961774     | SE | Portugal | Serrana      |
| AY961775-77  | SE | Portugal | Bravia       |
| AY961778-79  | SE | Portugal | Serrana      |
| AY961779     | SE | Portugal | Serrana      |
| AY961780-81  | SE | Portugal | Algarvia     |
| AY961782     | SE | Portugal | Charnequeira |
| AY961783-84  | SE | Portugal | Serrana      |
| AY961785-86  | SE | Portugal | Charnequeira |
| AY961787     | SE | Portugal | Algarvia     |
| AY961788-89  | SE | Portugal | Serrana      |
| AY961790     | SE | Portugal | Bravia       |
| AY961791-92  | SE | Portugal | Serrana      |
| AY961793     | SE | Portugal | Bravia       |
| AY961794     | SE | Portugal | Serpentina   |
| AY961795-99  | SE | Portugal | Serrana      |
| AY961800-801 | SE | Portugal | Serpentina   |
| AY961802     | SE | Portugal | Algarvia     |
| AY961803     | SE | Portugal | Charnequeira |
| AY961804     | SE | Portugal | Algarvia     |
| AY961805     | SE | Portugal | Charnequeira |
| AY961806-07  | SE | Portugal | Serpentina   |
| AY961808     | SE | Portugal | Bravia       |
| AY961809     | SE | Portugal | Algarvia     |
| AY961810-12  | SE | Portugal | Bravia       |
| AY961813-15  | SE | Portugal | Serpentina   |
| AY961816     | SE | Portugal | Algarvia     |
| AY961817     | SE | Portugal | Serpentina   |
| AY961818-19  | SE | Portugal | Serrana      |
| AY961820-21  | SE | Portugal | Bravia       |
| AY961822-23  | SE | Portugal | Algarvia     |
| AY961824-27  | SE | Portugal | Serpentina   |
| AY961828     | SE | Portugal | Charnequeira |
| AY961829-30  | SE | Portugal | Bravia       |
| AY961831     | SE | Portugal | Serpentina   |
| AY961832     | SE | Portugal | Serrana      |
| AY961833     | SE | Portugal | Bravia       |
| AY961834-35  | SE | Portugal | Charnequeira |
| AY961836     | SE | Portugal | Serrana      |
| AY961837-38  | SE | Portugal | Bravia       |
| AY961839     | SE | Portugal | Charnequeira |
| AY961840     | SE | Portugal | Serpentina   |
| AY961841     | SE | Portugal | Algarvia     |
| AY961842     | SE | Portugal | Serpentina   |
| AY961843-47  | SE | Portugal | Serrana      |
| AY961848-49  | SE | Portugal | Serpentina   |
| AY961850-51  | SE | Portugal | Serrana      |
| AY961852-54  | SE | Portugal | Serpentina   |
| AY961855-58  | SE | Portugal | Serrana      |

|              |    |          |              |
|--------------|----|----------|--------------|
| AY961859     | SE | Portugal | Bravia       |
| AY961860-61  | SE | Portugal | Algarvia     |
| AY961862-69  | SE | Portugal | Serrana      |
| AY961870-71  | SE | Portugal | Algarvia     |
| AY961872-74  | SE | Portugal | Charnequeira |
| AY961875-77  | SE | Portugal | Bravia       |
| AY961878     | SE | Portugal | Charnequeira |
| AY961879-81  | SE | Portugal | Serrana      |
| AY961882-83  | SE | Portugal | Bravia       |
| AY961884-87  | SE | Portugal | Charnequeira |
| AY961888-89  | SE | Portugal | Serrana      |
| AY961890     | SE | Portugal | Algarvia     |
| AY961891     | SE | Portugal | Charnequeira |
| AY961892-95  | SE | Portugal | Algarvia     |
| AY961896-97  | SE | Portugal | Charnequeira |
| AY961898-99  | SE | Portugal | Bravia       |
| AY961900     | SE | Portugal | Serrana      |
| AY961901-02  | SE | Portugal | Bravia       |
| AY961903-06  | SE | Portugal | Serrana      |
| AY961907     | SE | Portugal | Bravia       |
| AY961908-09  | SE | Portugal | Serrana      |
| AY961910     | SE | Portugal | Algarvia     |
| AY961911     | SE | Portugal | Serpentina   |
| AY961912     | SE | Portugal | Charnequeira |
| AY961913     | SE | Portugal | Algarvia     |
| AY961914     | SE | Portugal | Serrana      |
| AY961915-16  | SE | Portugal | Serpentina   |
| AJ317660-69  | SE | Portugal | ND           |
| AJ317698-701 | SE | Portugal | ND           |
| AJ317720-22  | SE | Portugal | ND           |
| AJ317726-30  | SE | Portugal | ND           |
| AJ317732-35  | SE | Portugal | ND           |
| AJ317606-18  | SE | Romania  | ND           |
| DQ241305-48  | SE | Sicily   | ND           |
| DQ241352-71  | SE | Sicily   | ND           |
| AJ317774-76  | SE | Cyprus   | ND           |
| AJ317686-97  | SE | Greece   | ND           |
| AJ317674-78  | SE | Italy    | ND           |
| AJ317680-85  | SE | Italy    | ND           |
| AJ317659     | SE | Malta    | ND           |
| AJ317702     | SE | Malta    | ND           |
| AJ317708     | SE | Malta    | ND           |
| AJ317625     | SE | Spain    | ND           |
| AJ317670-73  | SE | Spain    | ND           |
| AJ317679     | SE | Spain    | ND           |
| AJ317703     | SE | Spain    | ND           |
| AJ317704-07  | SE | Spain    | ND           |
| AJ317709-12  | SE | Spain    | ND           |

|              |    |          |                      |
|--------------|----|----------|----------------------|
| KR059146     | SE | Albania  | Mati                 |
| KR059148     | SE | Italy    | Camosciata           |
| KR059149     | SE | Spain    | Verata               |
| KR059156     | SE | Spain    | Payoya               |
| KR059162-64  | SE | Cyprus   | Cyprus               |
| KR059165     | SE | Italy    | Girgentana           |
| KR059166     | SE | Albania  | Muzhake              |
| KR059168-69  | SE | Spain    | Verata               |
| KR059170     | SE | Albania  | Muzhake              |
| KR059173     | SE | Spain    | Verata               |
| KR059174     | SE | Romania  | Carpathian           |
| KR059176-77  | SE | Italy    | Girgentana           |
| KR059182     | SE | Spain    | Verata               |
| KR059187     | SE | Romania  | Carpathian           |
| KR059190     | SE | Spain    | Payoya               |
| KR059193     | SE | Albania  | Mati                 |
| KR059195     | SE | Greece   | Skopelos             |
| KR059196     | SE | Italy    | Bionda               |
| KR059197     | SE | Italy    | Orobica              |
| KR059198     | SE | Romania  | Carpathian           |
| KR059205     | SE | Italy    | ND                   |
| KR059209     | SE | Italy    | Grigia Molisana      |
| KR059307-08  | SE | Italy    | Girgentana           |
| KR059309-17  | SE | Albania  | Capore               |
| KR059318-24  | SE | Albania  | Liquenasi            |
| KR059325-34  | SE | Albania  | Mati                 |
| KR059335     | SE | Albania  | Muzhake              |
| KR059336-41  | SE | Albania  | Muzhake              |
| KR059473-81  | SE | Greece   | Skopelos             |
| KR059482-501 | SE | Italy    | Capra di Montecristo |
| KR059561-71  | SE | Italy    | Argentata            |
| KR059572-73  | SE | Italy    | Bionda               |
| KR059574     | SE | Italy    | Camosciata           |
| KR059575-85  | SE | Italy    | Girgentana           |
| KR059586-98  | SE | Italy    | Grigia Molisana      |
| KR059599     | SE | Italy    | Orobica              |
| KR059600-01  | SE | Italy    | Sarda                |
| KR059602     | SE | Italy    | Valdostana           |
| KR059611-15  | SE | Romania  | Carpathian           |
| KR059628     | SE | Spain    | Malaguena            |
| KR059629-44  | SE | Spain    | Payoya               |
| KR059645-59  | SE | Spain    | Verata               |
| KR059697-702 | SE | Italy    | Garganica            |
| KR059719-32  | SE | Italy    | Val di Livo          |
| KR059739-49  | SE | Italy    | Nera di Verzasca     |
| EF618296-300 | SE | Romania  | Carpathian           |
| EF618301-08  | SE | Romania  | Austria Romania      |
| EF618287     | SE | Portugal | Ribatejana           |



|              |    |          |                     |
|--------------|----|----------|---------------------|
| EF618288-95  | SE | Portugal | Transmontana        |
| EF618232     | SE | Malta    | Alpine Malta        |
| EF617707     | SE | Cyprus   | Machaeras           |
| EF617816-19  | SE | Greece   | Indeterminate breed |
| EF617820-25  | SE | Greece   | Greek               |
| EF617826-39  | SE | Greece   | Skopelos            |
| EF617840-46  | SE | Greece   | Greek               |
| EF617849     | SE | Greece   | Skopelos            |
| EF618357     | SE | Spain    | Murcia Granada      |
| EF618358-61  | SE | Spain    | Indeterminate breed |
| EF618362-65  | SE | Spain    | Florida             |
| EF618366-71  | SE | Spain    | Guadarrama          |
| EF618372-76  | SE | Spain    | Payoya              |
| EF618377-80  | SE | Spain    | Verata              |
| EF618381-88  | SE | Spain    | Florida             |
| EF618389-96  | SE | Spain    | Guadarrama          |
| EF618397-404 | SE | Spain    | Payoya              |
| EF618405-12  | SE | Spain    | Verata              |
| EF617601-06  | SE | Albania  | Capore              |
| EF617607-12  | SE | Albania  | Dukati              |
| EF617613-18  | SE | Albania  | Hasi                |
| EF617619-20  | SE | Albania  | Liqenasi            |
| EF617621-23  | SE | Albania  | Mati                |
| EF617624-27  | SE | Albania  | Muzhake             |
| EF617628-36  | SE | Albania  | Capore              |
| EF617637-41  | SE | Albania  | Dukati              |
| EF617642-49  | SE | Albania  | Hasi                |
| EF617650-57  | SE | Albania  | Liqenasi            |
| EF617658-64  | SE | Albania  | Mati                |
| EF617665-72  | SE | Albania  | Muzhake             |
| EF617673-74  | SE | Albania  | Dukati              |
| EF617675     | SE | Albania  | Liqenasi            |
| EF617676     | SE | Albania  | Mati                |
| EF617677     | SE | Albania  | Liqenasi            |
| EF618087-92  | SE | Italy    | Argentatadelletna   |
| EF618093-99  | SE | Italy    | Biondadell Adamello |
| EF618100-02  | SE | Italy    | Camosciata Alpina   |
| EF618103-08  | SE | Italy    | Girgentana          |
| EF618109-12  | SE | Italy    | Grigia Molisana     |
| EF618113-14  | SE | Italy    | Orobica             |
| EF618115-20  | SE | Italy    | Sarda               |
| EF618121-27  | SE | Italy    | Valdostana          |
| EF618128-35  | SE | Italy    | Biondadell Adamello |
| EF618136-43  | SE | Italy    | Camosciata Alpina   |
| EF618144-49  | SE | Italy    | Orobica             |
| EF618150-57  | SE | Italy    | Valdostana          |
| EF618158-65  | SE | Italy    | Grigia Molisana     |
| EF618166-68  | SE | Italy    | Argentatadelletna   |

|                                                                                                               |      |             |                    |
|---------------------------------------------------------------------------------------------------------------|------|-------------|--------------------|
| EF618169-76                                                                                                   | SE   | Italy       | Girgentana         |
| EF618177-81                                                                                                   | SE   | Italy       | Argentatadelletna  |
| EF618182-89                                                                                                   | SE   | Italy       | Sarda              |
| EF618190                                                                                                      | SE   | Italy       | Argentatadelletna  |
| AB044295-98                                                                                                   | SEA  | Laos        | ND                 |
| AJ317553                                                                                                      | SEA  | Malaysia    | ND                 |
| AJ317566-68                                                                                                   | SEA  | Vietnam     | ND                 |
| MH760795                                                                                                      | SEA  | Indonesia   | Boer               |
| MH760792                                                                                                      | SEA  | Indonesia   | Boer               |
| AB440718-22                                                                                                   | SEA  | Myanmar     | ND                 |
| AB440728                                                                                                      | SEA  | Myanmar     | ND                 |
| AB750749-51                                                                                                   | SEA  | Philippines | ND                 |
| EF618221                                                                                                      | SEA  | Malaysia    | Katjang            |
| EF617702-05                                                                                                   | WA   | Azerbaijan  | Azeri              |
| EF617708-09                                                                                                   | WA   | Russia      | Dagestani          |
| EF618205-11                                                                                                   | WA   | Kazakhstan  | Kazak              |
| EF618212-16                                                                                                   | WA   | Kyrgyzstan  | Kyrgyz             |
| <b>Haplogroup B</b>                                                                                           |      |             |                    |
| MK139103,<br>MK139108,<br>MK139111-12,<br>MK139117,<br>MK139126-27,<br>MT747080-100,<br>MN865080,<br>MN865082 | ISEA | Andaman     | Andaman local goat |
| AJ317833                                                                                                      | EA   | Mongolia    | ND                 |
| AY860881                                                                                                      | EA   | China       | ND                 |
| AY860888                                                                                                      | EA   | China       | ND                 |
| AY860899                                                                                                      | EA   | China       | ND                 |
| AY860901                                                                                                      | EA   | China       | ND                 |
| AY860903                                                                                                      | EA   | China       | ND                 |
| AY860918                                                                                                      | EA   | China       | ND                 |
| AY860933                                                                                                      | EA   | China       | ND                 |
| AY860924                                                                                                      | EA   | China       | ND                 |
| AY860917                                                                                                      | EA   | China       | ND                 |
| AY860914                                                                                                      | EA   | China       | ND                 |
| AY860889                                                                                                      | EA   | China       | ND                 |
| AY860922                                                                                                      | EA   | China       | ND                 |
| AY860894                                                                                                      | EA   | China       | ND                 |
| DQ188857                                                                                                      | EA   | China       | ND                 |
| DQ188860                                                                                                      | EA   | China       | ND                 |
| DQ188873                                                                                                      | EA   | China       | ND                 |
| DQ188878                                                                                                      | EA   | China       | ND                 |
| DQ188896                                                                                                      | EA   | China       | ND                 |
| DQ121500                                                                                                      | EA   | China       | ND                 |
| DQ121504                                                                                                      | EA   | China       | ND                 |
| DQ121514                                                                                                      | EA   | China       | ND                 |

|             |    |       |    |
|-------------|----|-------|----|
| DQ121515-17 | EA | China | ND |
| DQ121528-30 | EA | China | ND |
| DQ121535    | EA | China | ND |
| DQ121537-39 | EA | China | ND |
| DQ121542    | EA | China | ND |
| DQ121549    | EA | China | ND |
| DQ121565-67 | EA | China | ND |
| DQ121569-71 | EA | China | ND |
| DQ121578-79 | EA | China | ND |
| DQ121581    | EA | China | ND |
| DQ121585    | EA | China | ND |
| DQ121591    | EA | China | ND |
| DQ121597-98 | EA | China | ND |
| DQ121603    | EA | China | ND |
| DQ121610-12 | EA | China | ND |
| DQ121616    | EA | China | ND |
| AY853287    | EA | China | ND |
| AY853291-92 | EA | China | ND |
| AY853294-95 | EA | China | ND |
| AY853300-01 | EA | China | ND |
| DQ089112    | EA | China | ND |
| DQ089115    | EA | China | ND |
| DQ089118    | EA | China | ND |
| DQ089124    | EA | China | ND |
| DQ089129    | EA | China | ND |
| DQ089134    | EA | China | ND |
| DQ089138    | EA | China | ND |
| DQ089149-50 | EA | China | ND |
| DQ089154    | EA | China | ND |
| DQ089158-60 | EA | China | ND |
| DQ089162-63 | EA | China | ND |
| DQ089176    | EA | China | ND |
| DQ089179    | EA | China | ND |
| DQ089181    | EA | China | ND |
| DQ089183-85 | EA | China | ND |
| DQ089193    | EA | China | ND |
| DQ089195-97 | EA | China | ND |
| DQ089199    | EA | China | ND |
| DQ089201    | EA | China | ND |
| DQ089205    | EA | China | ND |
| DQ089207    | EA | China | ND |
| DQ089209    | EA | China | ND |
| DQ089214-15 | EA | China | ND |
| DQ089218    | EA | China | ND |
| DQ089223    | EA | China | ND |
| DQ089226-27 | EA | China | ND |
| DQ089229    | EA | China | ND |
| DQ089231    | EA | China | ND |

|             |    |          |              |
|-------------|----|----------|--------------|
| DQ089235    | EA | China    | ND           |
| DQ089240-41 | EA | China    | ND           |
| DQ089245    | EA | China    | ND           |
| DQ089249    | EA | China    | ND           |
| DQ089251    | EA | China    | ND           |
| DQ089256-58 | EA | China    | ND           |
| DQ089260-61 | EA | China    | ND           |
| DQ089264    | EA | China    | ND           |
| DQ089267-70 | EA | China    | ND           |
| DQ089272-73 | EA | China    | ND           |
| DQ089278-79 | EA | China    | ND           |
| DQ089283    | EA | China    | ND           |
| DQ089285    | EA | China    | ND           |
| DQ089295-96 | EA | China    | ND           |
| DQ089300-02 | EA | China    | ND           |
| DQ089304-08 | EA | China    | ND           |
| DQ089357-58 | EA | China    | ND           |
| DQ089363-64 | EA | China    | ND           |
| DQ089366    | EA | China    | ND           |
| DQ089369    | EA | China    | ND           |
| DQ089374    | EA | China    | ND           |
| DQ089377-78 | EA | China    | ND           |
| DQ089396    | EA | China    | ND           |
| DQ089403-05 | EA | China    | ND           |
| DQ089407-08 | EA | China    | ND           |
| DQ089410-13 | EA | China    | ND           |
| DQ089421    | EA | China    | ND           |
| KR059219    | ME | Iran     | Bezoar       |
| KR059305-06 | ME | Iran     | Bezoar       |
| KR059703    | ME | Iran     | ND           |
| KR059819    | ME | Iran     | Taleshi      |
| EF618257    | SA | Pakistan | Beetal       |
| JX271770-71 | SA | India    | Surti        |
| JX271767    | SA | India    | Surti        |
| JX271747    | SA | India    | Sangamneri   |
| JX271716    | SA | India    | Malabari     |
| JX271710    | SA | India    | Malabari     |
| JX271675    | SA | India    | Jamunapari   |
| MH489429    | SA | India    | Jamunapari   |
| JX271648    | SA | India    | Ganjam       |
| JX271619    | SA | India    | Black Bengal |
| JX271603    | SA | India    | Beetal       |
| KC817824    | SA | India    | Barbari      |
| KX274335-36 | SA | India    | Barbari      |
| AJ317827    | SA | India    | ND           |
| AJ317830    | SA | India    | ND           |
| AY155682    | SA | India    | ND           |
| AY155834    | SA | India    | ND           |

|                                                          |      |              |             |
|----------------------------------------------------------|------|--------------|-------------|
| MG923227                                                 | SA   | India        | ND          |
| MG923272                                                 | SA   | India        | ND          |
| MG923246                                                 | SA   | India        | ND          |
| MG923249                                                 | SA   | India        | ND          |
| MG923267                                                 | SA   | India        | ND          |
| MG923296                                                 | SA   | India        | ND          |
| MG923299                                                 | SA   | India        | ND          |
| AY155880                                                 | SA   | India        | ND          |
| AY155883                                                 | SA   | India        | ND          |
| AY155994                                                 | SA   | India        | ND          |
| AJ317826                                                 | SA   | Pakistan     | ND          |
| AB110554                                                 | SA   | Pakistan     | Teddy       |
| AB110556                                                 | SA   | Pakistan     | Teddy       |
| AB110564                                                 | SA   | Pakistan     | Teddy       |
| AB110571                                                 | SA   | Pakistan     | Long Hairy  |
| EF618257                                                 | SA   | Pakistan     | Beetal      |
| EF618258                                                 | SA   | Pakistan     | Nachi       |
| EF61825                                                  | SA   | Pakistan     | Nachi       |
| EF618260-63                                              | SA   | Pakistan     | Teddy       |
| AJ317844                                                 | SAF  | South Africa | ND          |
| EF618355-56                                              | SAF  | South Africa | Ciskei      |
| EF617850                                                 | SE   | Greece       | Greek       |
| EF618222                                                 | SEA  | Malaysia     | Katjang     |
| AB044299                                                 | SEA  | Laos         | ND          |
| AB044300-04                                              | SEA  | Laos         | ND          |
| AJ317828-29                                              | SEA  | Malaysia     | ND          |
| AJ317831-32                                              | SEA  | Malaysia     | ND          |
| MF048904                                                 | SEA  | Indonesia    | Samosir     |
| MH760783-90                                              | SEA  | Indonesia    | ND          |
| MH760791                                                 | SEA  | Indonesia    | Boer        |
| MH760793-94                                              | SEA  | Indonesia    | Boer        |
| AB440723-27                                              | SEA  | Myanmar      | ND          |
| AB440717                                                 | SEA  | Myanmar      | ND          |
| AB750747-48                                              | SEA  | Philippines  | ND          |
| KR059220                                                 | SEA  | Malaysia     | Malaysia    |
| EF618222-30                                              | SEA  | Malaysia     | Katjang     |
| EF617706                                                 | WA   | Azerbaijan   | Ajeri       |
| <b>Haplogroup D</b>                                      |      |              |             |
| MK139131,<br>MK139133-35,<br>MK139138-39,<br>MT747127-46 | ISEA | Andaman      | Teresa goat |
| KR059211-12                                              | CA   | Kyrgyzstan   | Kyrgyzstan  |
| DQ188888                                                 | EA   | China        | ND          |
| DQ188893                                                 | EA   | China        | ND          |
| DQ089350                                                 | EA   | China        | ND          |
| KR059210                                                 | ME   | Iran         | Bezoar      |
| EF617701                                                 | NE   | Austria      | Pinzgau     |

|             |    |            |           |
|-------------|----|------------|-----------|
| AY155964-65 | SA | India      | ND        |
| AY155952    | SA | India      | ND        |
| MH489395    | SA | India      | Gohilwadi |
| EF618217-19 | WA | Kyrgyzstan | Kyrgyz    |

ND indicates no information on breed.

**Table S3.** AMOVA analysis of haplogroup A goats of Andaman and other different regions

| Source of variation | d. f. | Sum of squares | Variance Components | Percentage of variation | Fixation Index FST | P-value         |
|---------------------|-------|----------------|---------------------|-------------------------|--------------------|-----------------|
| Among populations   | 9     | 12231.217      | 3.80198 Va          | 16.05                   | 0.16052            | 0.00000±0.00000 |
| Within populations  | 3914  | 77826.588      | 19.88416 Vb         | 83.95                   |                    |                 |
| Total               | 3929  | 90057.805      |                     |                         |                    |                 |

**Table S4.** AMOVA analysis of haplogroup B goats of Andaman and other different regions

| Source of variation | d.f. | Sum of squares | Variance Components | Percentage of variation | Fixation Index FST | P-value         |
|---------------------|------|----------------|---------------------|-------------------------|--------------------|-----------------|
| Among populations   | 7    | 110.980        | 0.56302 Va          | 25.01                   | 0.25015            | 0.00000±0.00000 |
| Within populations  | 266  | 448.939        | 1.68774 Vb          | 74.99                   |                    |                 |
| Total               | 273  | 559.920        | 2.25077             |                         |                    |                 |

**Table S5.** AMOVA analysis of haplogroup D goats of Andaman and other different regions

| Source of variation | d.f. | Sum of squares | Varianace components | Percentage of variation | FST     | P value         |
|---------------------|------|----------------|----------------------|-------------------------|---------|-----------------|
| Among populations   | 6    | 9.413          | 0.38298 Va           | 84.35                   | 0.84346 | 0.00000±0.00000 |
| Within populations  | 34   | 2.417          | 0.07108 Vb           | 15.65                   |         |                 |
| Total               | 40   | 11.829         | 0.45406              |                         |         |                 |

**Table S6.** Haplotype diversity of goat breeds

| S. No.          | Breed              | Region                      | GenBank Accession nos.                                                                                                                                                                                                          | No. of Haplotypes (h) | Haplotype Diversity (Hd $\pm$ SD) | Nucleotide Diversity (Pi $\pm$ SD) | Haplogroups       |
|-----------------|--------------------|-----------------------------|---------------------------------------------------------------------------------------------------------------------------------------------------------------------------------------------------------------------------------|-----------------------|-----------------------------------|------------------------------------|-------------------|
| South Asia (SA) |                    |                             |                                                                                                                                                                                                                                 |                       |                                   |                                    |                   |
| 1               | Andaman Local Goat | Andaman and Nicobar Islands | MK139101<br>-<br>MK139130<br>,<br>MN865073<br>-<br>MN865082<br>,<br>MT747030<br>-<br>MT747126<br>(n=137)                                                                                                                        | 35                    | 0.897 $\pm$ 0.011                 | 0.01865 $\pm$ 0.00093              | A = 112<br>B = 25 |
| 2               | Terresa Goat       | Andaman and Nicobar Islands | MK139131<br>-<br>MK139140<br>,<br>MT747127<br>-<br>MT747164<br>(n=48)                                                                                                                                                           | 4                     | 0.621 $\pm$ 0.052                 | 0.01882 $\pm$ 0.00104              | A = 22<br>D = 26  |
| 3.              | Barbari            | UP and Rajasthan            | JX271587-<br>JX271597,<br>JX271599-<br>JX271600,<br>KC817816<br>-<br>KC817821,<br>KC817823,<br>KC817825-<br>KC817829,<br>KX274327-<br>KX274334,<br>KX274335-<br>KX274336,<br>AB110583<br>-<br>AB110584,<br>AB162213<br>(n = 41) | 26                    | 0.929 $\pm$ 0.032                 | 0.03695 $\pm$ 0.00226              | A = 39<br>B = 3   |
| 4               | Black              | West                        | JX271612-                                                                                                                                                                                                                       | 37                    | 0.979 $\pm$ 0.011                 | 0.027 $\pm$ 0.0032                 | A =48             |



|    |                 |                       |                                                                                                                   |    |             |                 |                 |
|----|-----------------|-----------------------|-------------------------------------------------------------------------------------------------------------------|----|-------------|-----------------|-----------------|
|    | Bengal          | Bengal and Bangladesh | JX271614,<br>JX271616-<br>JX271619-<br>JX271625,<br>KC817843-<br>KC817862,<br>DQ521886<br>-<br>DQ521871<br>(n=49) |    |             |                 | B = 1           |
| 5  | Changthang<br>i | Jammu and<br>Kashmir  | JX271626-<br>JX271636,<br>KC817863-<br>KC817882<br>(n=31)                                                         | 28 | 0.991±0.012 | 0.02002±0.00375 | A = 30<br>C = 1 |
| 6  | Chegu           | Himachal<br>Pradesh   | JX271637-<br>JX271639,<br>MH489355<br>-<br>MH489366<br>(n=15)                                                     | 14 | 0.990±0.028 | 0.01954±0.00250 | A = 15          |
| 7  | Gaddi           | Himachal<br>Pradesh   | JX271640-<br>JX271642,<br>KC817883-<br>KC817906<br>(n=27)                                                         | 23 | 0.990±0.019 | 0.01554±0.00226 | A = 27          |
| 8  | Ganjam          | Orrisa                | JX271643-<br>JX271650,<br>KC817907-<br>KC817923<br>(n=25)                                                         | 24 | 0.997±0.012 | 0.02284±0.00387 | A = 25<br>B = 1 |
| 9  | Gohilwadi       | Gujrat                | JX271651-<br>JX271663,<br>KC817924-<br>KC817947,<br>MH489387<br>-<br>MH489402<br>(n=53)                           | 48 | 0.996±0.004 | 0.02145±0.00166 | A = 52<br>D = 1 |
| 10 | Jakhrana        | Rajasthan             | MH489410<br>-<br>MH489419<br>(n=10)                                                                               | 10 | 0.982±0.046 | 0.03069±0.004   | A = 10          |
| 11 | Jamunapari      | Uttar<br>Pradesh      | JX271666-<br>JX271678,<br>KX274367-<br>KX274376,<br>MH489420                                                      | 34 | 0.947±0.013 | 0.02456±0.00223 | A = 73<br>B = 2 |

|    |                |                       |                                                                                                 |    |             |                 |               |
|----|----------------|-----------------------|-------------------------------------------------------------------------------------------------|----|-------------|-----------------|---------------|
|    |                |                       | -<br>MH489430                                                                                   |    |             |                 |               |
|    |                |                       | ,<br>KP671321-<br>KP671345,<br>KP671347-<br>KP671360<br>(n=73)                                  |    |             |                 |               |
| 12 | Kanniadu       | Tamil Nadu            | JX271685-<br>JX271696<br>(n=12)                                                                 | 5  | 0.667±0.141 | 0.00470±0.00182 | A = 12        |
| 13 | Kutchi         | Gujarat               | JX271697-<br>JX271706<br>(n=10)                                                                 | 10 | 1.00±0.045  | 0.02356±0.00653 | A = 10        |
| 14 | Malabari       | Kerala                | JX271710-<br>JX271716,<br>KC817976-<br>KC817990<br>(n=26)                                       | 17 | 0.960±0.022 | 0.02318±0.00431 | A = 24, B = 2 |
| 15 | Marwari        | Rajasthan             | JX271717-<br>JX271726,<br>KC817992-<br>KC818010<br>(n=29)                                       | 22 | 0.975±0.017 | 0.01674±0.00124 | A = 29        |
| 16 | Mehsana        | Gujarat               | JX271728-<br>JX271727,<br>KC818011-<br>KC818027<br>(n=19)                                       | 16 | 0.977±0.027 | 0.01865±0.00168 | A = 19        |
| 17 | Osmanabad<br>i | Maharashtra           | JX271729-<br>JX271738,<br>KC818028-<br>KC818038,<br>KX274347-<br>KX274356<br>(n=31)             | 17 | 0.880±0.051 | 0.0175±0.00143  | A = 31        |
| 18 | Sangamneri     | Maharashtra           | JX271749,<br>JX271745-<br>JX271747,<br>JX271739-<br>JX271743,<br>KX274357<br>KX274366<br>(n=19) | 11 | 0.738±0.106 | 0.01683±0.00562 | A = 18, B = 1 |
| 19 | Sirohi         | Rajasthan,<br>Gujarat | JX271750-<br>JX271762,<br>KC818663-<br>KC818685,                                                | 30 | 0.931±0.028 | 0.02291±0.00124 | A = 46        |

|    |          |             |                                                                                                               |    |              |                 |               |
|----|----------|-------------|---------------------------------------------------------------------------------------------------------------|----|--------------|-----------------|---------------|
|    |          |             | KX274337-<br>KX274346<br>(n=46)                                                                               |    |              |                 |               |
| 20 | Surti    | Gujarat     | JX271763-<br>JX271774<br>(n=12)                                                                               | 8  | 0.924±0.057  | 0.3334±0.00564  | A = 9, B = 3  |
| 21 | Attapady | Kerala      | MH489322<br>-<br>MH489323<br>/<br>MH489263<br>-<br>MH489274<br>(n=14)                                         | 14 | 1.00±0.027   | 0.02321±0.00538 | A = 14        |
| 22 | Beetal   | Punjab      | JX271601-<br>JX271611,<br>KC817830-<br>KC817842,<br>AB110585-<br>AB110588,<br>EF618253,<br>EF618257<br>(n=30) | 26 | 0.989±0.013  | 0.02866±0.00432 | A = 28, B = 2 |
| 23 | Berari   | Maharashtra | MH489305<br>-<br>MH489314<br>(n=10)                                                                           | 10 | 0.982±0.046  | 0.04296±0.01356 | A = 10, C = 1 |
| 24 | Zalawadi | Gujarat     | JX271775-<br>JX271778,<br>KC818086-<br>KC818105,<br>MH489241<br>-<br>MH489254<br>(n=38)                       | 34 | 0.994±0.007  | 0.02111±0.00150 | A = 38        |
| 25 | Bidri    | Karnataka   | MH489315<br>-<br>MH489321<br>(n=7)                                                                            | 7  | 1.00±0.076   | 0.02605±0.01009 | A = 7         |
| 26 | Kodi Adu | Tamil Nadu  | KP671449-<br>KP671451,<br>KP671453-<br>KP671456<br>(n=7)                                                      | 8  | 1.00 ± 0.063 | 0.01010±0.00136 | A = 8         |
| 27 | Ragestan | Rajasthan   | EF617856-<br>EF617862<br>(n=7)                                                                                | 7  | 1.000 ±0.076 | 0.34085±0.05290 | A = 7         |

|                  |                |          |                                                                           |   |              |                  |                              |
|------------------|----------------|----------|---------------------------------------------------------------------------|---|--------------|------------------|------------------------------|
| 28               | Dera Din Panah | Pakistan | EF618254-<br>EF618255,<br>AB110580-<br>AB110582<br>(n=5)                  | 4 | 0.900±0.161  | 0.01497±0.00327  | A = 5                        |
| 29               | Khurawsani     | Pakistan | AB110575-<br>AB110578<br>(n=4)                                            | 4 | 1.00±0.177   | 0.00948±0.00191  | A = 4                        |
| 30               | Kohistani      | Pakistan | AB110572-<br>AB110574<br>(n=3)                                            | 3 | 1.00±0.272   | 0.00621±0.00215  | A = 3                        |
| 31               | Lehri          | Pakistan | AB110568-<br>AB110570<br>(n=3)                                            | 3 | 1.00 ±0.272  | 0.00869±0.00278  | A = 3                        |
| 32               | Long Hairy     | Pakistan | AB110570<br>AB110571,<br>(n=2)                                            | 2 | 1.00±0.50    | 0.03818±0.01909  | A = 1, B = 1                 |
| 33               | Nachi          | Pakistan | AB110564-<br>AB110566,<br>EF618255,<br>EF618258-<br>EF618259<br>(n=6)     | 5 | 0.933±0.122  | 0.04047±0.00762  | A = 3, B = 3                 |
| 34               | Pak Angaora    | Pakistan | AB110560<br>-AB110563<br>(n=4)                                            | 4 | 1.00 ±0.177  | 0.01377±0.00292  | A = 4                        |
| 35               | Patri          | Pakistan | AB110557-<br>AB110559<br>(n=3)                                            | 3 | 1.00 ±0.272  | 0.04035 ±0.01496 | A = 2, C = 1                 |
| 36               | Tapri          | Pakistan | AB110552<br>-AB110553<br>(n=2)                                            | 2 | 1.00±0.50    | 0.00495±0.00248  | A = 2                        |
| 37               | Teddy          | Pakistan | EF618260 -<br>EF618263,<br>AB110554-<br>AB110556<br>(n=7)                 | 4 | 0.714 ±0.181 | 0.02515±0.01542  | B =5, C = 1                  |
| Middle East (ME) |                |          |                                                                           |   |              |                  |                              |
| 38               | Bezoar         | Iran     | KR059210,<br>KR059219,<br>KR059221<br>-<br>KR059222,<br>KR059226<br>(n=5) | 6 | 0.952±0.096  | 0.07523±0.01300  | B = 1, C = 2<br>D = 1, F = 1 |
| 39               | Kermansha h    | Iran     | KR059207<br>-                                                             | 3 | 1.00±0.272   | 0.02090±0.00693  | A = 3, G = 1                 |

|    |           |      |                                                                                                                                                                                             |    |             |                 |              |
|----|-----------|------|---------------------------------------------------------------------------------------------------------------------------------------------------------------------------------------------|----|-------------|-----------------|--------------|
|    |           |      | KR059208,<br>KR059189,<br>KR059213<br>(n=4)                                                                                                                                                 |    |             |                 |              |
| 40 | khalkhali | Iran | KR059218,<br>KR059704<br>-                                                                                                                                                                  | 16 | 0.993±0.023 | 0.01366±0.00311 | A= 16, G = 1 |
|    |           |      | KR059718,<br>KR059512<br>(n=17)                                                                                                                                                             |    |             |                 |              |
| 41 | Kuhaki    | Iran | KR059505,<br>KR059524,<br>KR059529,<br>KR059533-<br>KR059535,<br>KR059538,<br>KR059517,<br>KR059542-<br>KR059543,<br>KR059546,<br>KR059548,<br>KR059553,<br>KR059556,<br>KR059558<br>(n=15) | 13 | 0.981±0.031 | 0.01514±0.00091 | A=15         |
|    |           |      | KR059191,<br>EF617975 -<br>EF618001 -<br>EF618003 -<br>EF618007<br>(n=33)                                                                                                                   | 26 | 0.985±0.011 | 0.02069±0.00138 | A = 33       |
| 42 | Kurdi     | Iran | EF617865,<br>EF617868,<br>EF617870-<br>EF617871,<br>EF617873,<br>EF617875,<br>EF618068-<br>EF618069<br>(n=27)                                                                               | 24 | 0.991±0.013 | 0.02133±0.00151 | A = 27       |
| 43 | Marghoz   | Iran | KR059192,<br>KR059750-<br>KR059764,<br>KR059525<br>(n=17)                                                                                                                                   | 17 | 1.00±0.020  | 0.01274±0.0078  | A = 17       |
| 44 | Naini     | Iran | KR059765-<br>KR059770<br>(n=6)                                                                                                                                                              | 6  | 1.00±0.096  | 0.01531±0.00182 | A = 6        |
| 45 | Najdi     | Iran |                                                                                                                                                                                             |    |             |                 |              |

|    |               |        |                                                                                                                                                                   |    |              |                  |                        |
|----|---------------|--------|-------------------------------------------------------------------------------------------------------------------------------------------------------------------|----|--------------|------------------|------------------------|
| 46 | Native Abadeh | Iran   | KR059253-<br>KR059266<br>(n=14)                                                                                                                                   | 13 | 0.989±0.031  | 0.01171±0.00089  | A = 14                 |
| 47 | Native Qazvin | Iran   | KR059507,<br>KR059514,<br>KR059519,<br>KR059521,<br>KR059532,<br>KR059527,<br>KR059503<br>(n=7)                                                                   | 6  | 0.952±0.096  | 0.01386±0.00213  | A = 7                  |
| 48 | Raini         | Iran   | EF618017 -<br>EF618056<br>(n = 40)                                                                                                                                | 41 | 0.995±0.006  | 0.02237±0.00095  | A = 40                 |
| 49 | Taleshi       | Iran   | KR059504,<br>KR059506,<br>KR059508-<br>KR059511,<br>KR059515-<br>KR059516,<br>KR059522-<br>KR059523,<br>KR059816-<br>KR059819,<br>KR059820-<br>KR059828<br>(n=23) | 19 | 0.984 ±0.017 | 0.01587±0.00293  | A= 21, B = 1,<br>G = 1 |
| 50 | Turki         | Iran   | KR059502,<br>KR059506,<br>KR059526,<br>KR059528-<br>KR059543,<br>KR059520,<br>KR059530<br>-<br>KR059531,<br>KR059513,<br>KR059518<br>(n=24)                       | 23 | 0.996± 0.013 | 0.02358 ±0.00391 | A= 22, D = 1,<br>G = 1 |
| 51 | Hair          | Turkey | KR059204,<br>EF618527-<br>EF618534,<br>EF618505-<br>EF618506,<br>KR059158,<br>KR059215<br>(n=13)                                                                  | 17 | 0.981±0.020  | 0.02127±0.00347  | A= 20, G = 1           |

|    |         |                 |                                                                                                               |    |              |                 |              |
|----|---------|-----------------|---------------------------------------------------------------------------------------------------------------|----|--------------|-----------------|--------------|
| 52 | Gurku   | Turkey          | EF618523-<br>EF618526,<br>EF618535-<br>EF618537,<br>EF618498-<br>EF618504,<br>KR059161,<br>KR059203<br>(n=16) | 15 | 0.964 ±0.020 | 0.02516±0.00351 | A= 13, G = 3 |
| 53 | Angora  | Turkey          | KR059214,<br>KR059202-<br>KR059200,<br>EF618497,<br>EF618515-<br>EF618522<br>(n=17)                           | 20 | 0.998±0.016  | 0.02975±0.00361 | A= 16, G = 1 |
| 54 | Abaza   | Turkey          | KR059179,<br>KR059186,<br>KR059199,<br>EF618492-<br>EF618496,<br>EF618507 -<br>EF618514<br>(n=16)             | 21 | 0.976±0.023  | 0.01878±0.00218 | A = 16       |
| 55 | Najrani | Saudi<br>Arabia | EF618331,<br>EF618344-<br>EF618345,<br>EF618315-<br>EF618321,<br>EF618332-<br>EF618340,<br>KR059154<br>(n=20) | 21 | 0.989±0.015  | 0.02752±0.00384 | A= 18, G = 2 |
| 56 | Beeshi  | Saudi<br>Arabia | KR059184,<br>EF618309 -<br>EF618314,<br>EF618341-<br>EF618343,<br>EF618322 -<br>EF618330<br>(n=19)            | 23 | 0.984±0.014  | 0.02367±0.00325 | A= 16, G = 3 |
| 57 | Baladi  | Jordan          | EF617727 -<br>EF617728,<br>EF618191-<br>EF618204,<br>KR059153,<br>KR059160,<br>KR059183                       | 16 | 0.974±0.019  | 0.02576±0.00421 | A= 17, G = 2 |



|                       |            |                     |                                                           |   |              |                 |              |
|-----------------------|------------|---------------------|-----------------------------------------------------------|---|--------------|-----------------|--------------|
|                       |            |                     | (n=19)                                                    |   |              |                 |              |
| South East Asia (SEA) |            |                     |                                                           |   |              |                 |              |
| 58                    | Boar       | Indonesia           | MH760791 -<br>MH760795<br>(n=5)                           | 5 | 1.000± 0.126 | 0.02265±0.00605 | A = 2, B = 3 |
| 59                    | Katjang    | Malaysia            | EF618221-<br>EF618230<br>(n=10)                           | 5 | 0.818±0.083  | 0.01187±0.00683 | A = 1, B = 9 |
| Western Asia (WA)     |            |                     |                                                           |   |              |                 |              |
| 60                    | Azeri      | Azerbaijan          | EF617702 -<br>EF617706<br>(n=5)                           | 5 | 1.000±0.126  | 0.43448±0.14531 | A = 4, B = 1 |
| 61                    | Dagestani  | Russia-<br>Dagestan | EF617708-<br>EF617709<br>(n=2)                            | 2 | 1.000±0.500  | 0.01663±0.00832 | A = 2        |
| 62                    | Kazak      | Kazakhstan          | EF618205 -<br>EF618211<br>(n=7)                           | 6 | 0.952±0.096  | 0.01841±0.00326 | A = 5        |
| 63                    | Kyrgyzstan | Kyrgyzstan          | EF618212 -<br>KR058216,<br>KR059211-<br>KR059212<br>(n=7) | 7 | 1.000±0.076  | 0.40952±0.05979 | A = 5, D = 2 |
